# Supplementary material
Source: PubMed Central journal article supplement (PMC3912549)
Supplement: supp_113.210435_jpet210435_suppl_figs.pdf [file supp_113.210435_jpet210435_suppl_figs.pdf]

## Heat Shock Protein 70 is Necessary to Improve Mitochondrial Bioenergetics and Reverse Diabetic Sensory Neuropathy Following KU-32 Therapy

Jiacheng Ma, Kevin L. Farmer, Pan Pan, Michael J. Urban, Huiping Zhao, Brian S.J. Blagg and Rick T. Dobrowsky

Journal of Pharmacology and Experimental Therapeutics

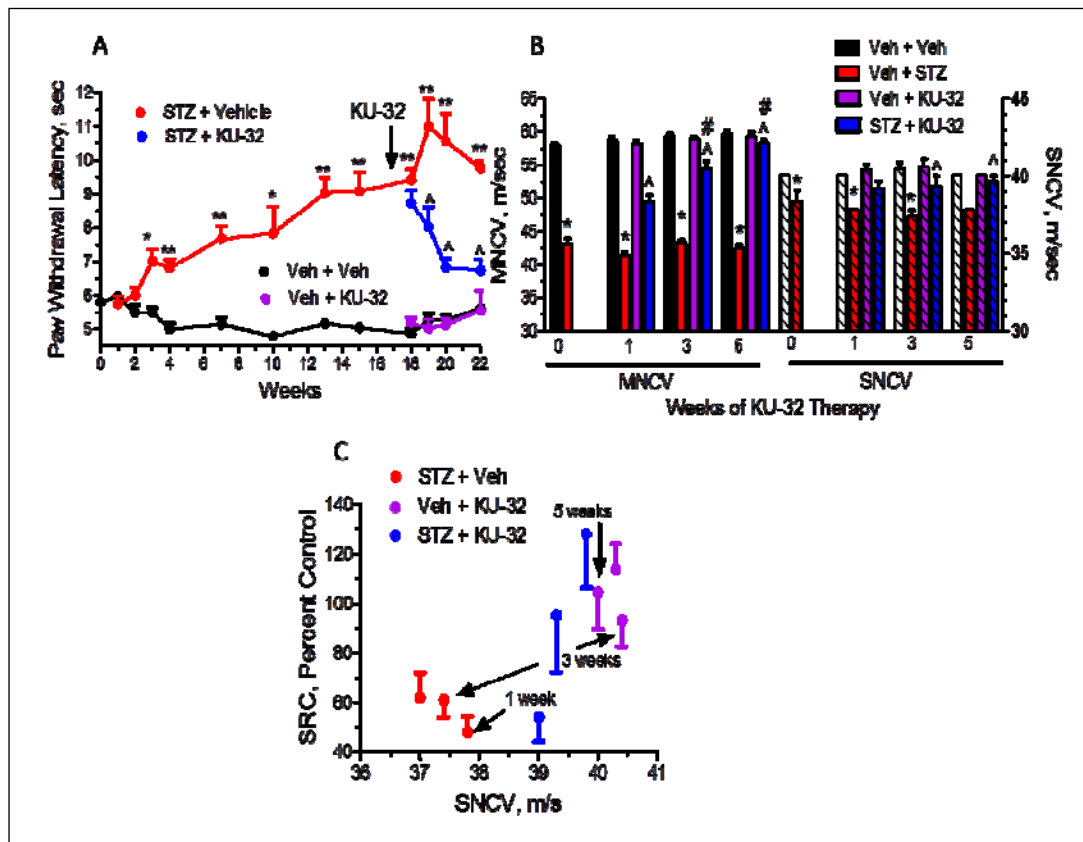

**Supplemental Figure 1- Effect of Diabetes and KU-32 Therapy on Thermal Hypoalgesia, NCV and Mitochondrial Bioenergetics.** Swiss Webster mice were rendered diabetic with STZ and thermal sensitivity assessed at the indicated weeks. After 17 weeks of diabetes, KU-32 was given weekly and at 1, 3 and 5 weeks after drug administration, NCV was measured and sensory neurons were isolated to assess mitochondrial bioenergetics. **A)** Diabetes induced a thermal hypoalgesia that was reversed by KU-32 treatment. \*,  $p < 0.05$ , \*\*,  $p < 0.01$  vs time-matched Veh + Veh; ^,  $p < 0.05$  vs time-matched STZ + Veh. **B)** Both MNCV and SNCV were decreased after 16 weeks of diabetes (0 weeks KU-32) and drug therapy improved these deficits. \*,  $p < 0.05$  vs Veh + Veh; ^,  $p < 0.05$  vs STZ + Veh; #,  $p < 0.05$  vs STZ + 1 week KU-32. **(C)** Correlation between recovery of SRC and improvement in SNCV.

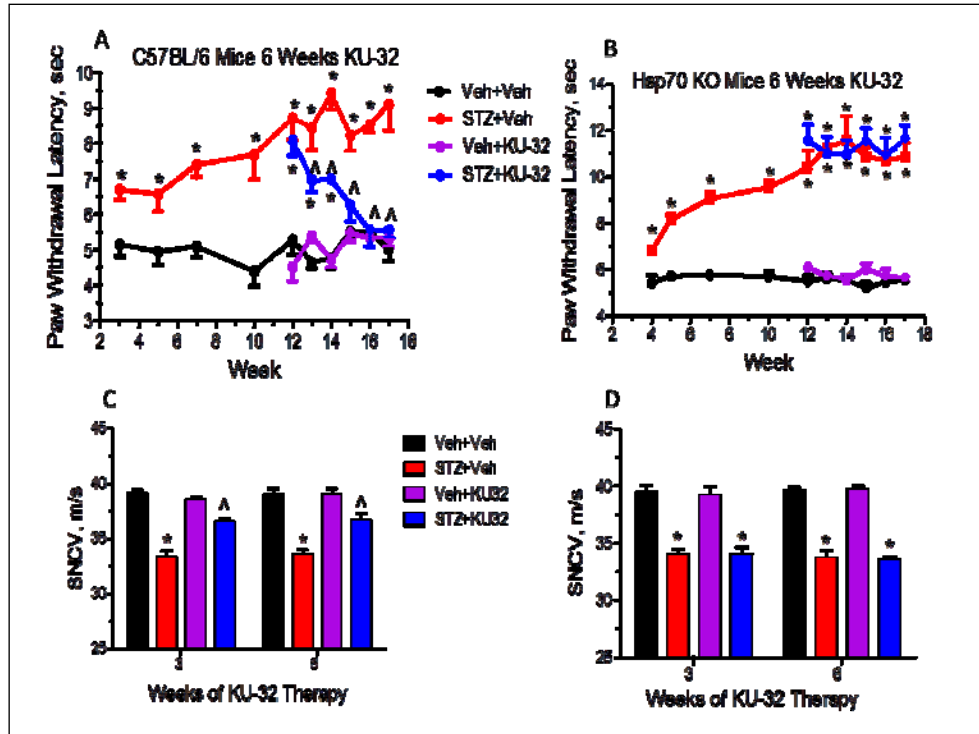

**Supplemental Figure 2- Hsp70 is Necessary for KU-32 to Reverse DPN.** C57BL/6 (A, C) and Hsp70 KO (B, D) mice were rendered diabetic with STZ and at 12 weeks of diabetes, KU-32 was given weekly for 6 weeks. Thermal sensitivity (A, B) was assessed at the indicated weeks and SNCV (C, D) was assessed after 15 (3 weeks KU-32) and 18 weeks (6 weeks KU-32) of diabetes. \*,  $p < 0.05$  vs Veh + Veh; ^,  $p < 0.05$  vs STZ + Veh. Symbol and bar colors in legend are shared between (A and B) and (C and D), respectively.
